# Supplementary material for: Beyond Competencies: Associations between Personality and School Grades Are Largely Independent of Subject-Specific and General Cognitive Competencies
Source: MDPI journal article supplement (doi:10.3390/jintelligence10020026), 2022-04-27
Supplement: s1 [file s1]

Table S1

*Means, Standard Deviations, and Correlations Among the Measured Variables*

| Variable                          | <i>M</i> | <i>SD</i> | 1     | 2     | 3    | 4     | 5     | 6     | 7     | 8     | 9     | 10    | 11    | 12    | 13    | 14    | 15   | 16    | 17    | 18    | 19    | 20    | 21    | 22    | 23    | 24    | 25    | 26  |
|-----------------------------------|----------|-----------|-------|-------|------|-------|-------|-------|-------|-------|-------|-------|-------|-------|-------|-------|------|-------|-------|-------|-------|-------|-------|-------|-------|-------|-------|-----|
| 7th Grade                         |          |           |       |       |      |       |       |       |       |       |       |       |       |       |       |       |      |       |       |       |       |       |       |       |       |       |       |     |
| 1. Neuroticism                    | 2.83     | 0.83      |       |       |      |       |       |       |       |       |       |       |       |       |       |       |      |       |       |       |       |       |       |       |       |       |       |     |
| 2. Extraversion                   | 3.40     | 0.79      | -.23* |       |      |       |       |       |       |       |       |       |       |       |       |       |      |       |       |       |       |       |       |       |       |       |       |     |
| 3. Openness                       | 3.45     | 0.96      | .02   | .09*  |      |       |       |       |       |       |       |       |       |       |       |       |      |       |       |       |       |       |       |       |       |       |       |     |
| 4. Agreeableness                  | 3.46     | 0.65      | -.02  | -.01  | .19* |       |       |       |       |       |       |       |       |       |       |       |      |       |       |       |       |       |       |       |       |       |       |     |
| 5. Conscientious.                 | 3.23     | 0.85      | -.04* | .00   | .10* | .30*  |       |       |       |       |       |       |       |       |       |       |      |       |       |       |       |       |       |       |       |       |       |     |
| 6. General Cog. Comp <sup>a</sup> | 6.89     | 2.62      | -.06* | -.00  | .09* | -.01  | -.04  |       |       |       |       |       |       |       |       |       |      |       |       |       |       |       |       |       |       |       |       |     |
| 7. German Comp.                   | -0.00    | 0.89      | -.02  | .06*  | .15* | .05*  | .09*  | .44*  |       |       |       |       |       |       |       |       |      |       |       |       |       |       |       |       |       |       |       |     |
| 8. Math Comp.                     | 0.72     | 1.22      | -.10* | .02   | .09* | -.01  | -.01  | .54*  | .63*  |       |       |       |       |       |       |       |      |       |       |       |       |       |       |       |       |       |       |     |
| 9. Science Comp. <sup>b</sup>     | 0.08     | 1.15      | -.10* | .02   | .11* | -.04* | -.05* | .47*  | .62*  | .66*  |       |       |       |       |       |       |      |       |       |       |       |       |       |       |       |       |       |     |
| 10. German Grade                  | 4.30     | 0.83      | -.01  | .09*  | .13* | .08*  | .20*  | .17*  | .45*  | .27*  | .29*  |       |       |       |       |       |      |       |       |       |       |       |       |       |       |       |       |     |
| 11. Math Grade                    | 4.21     | 0.98      | -.06* | -.01  | .00  | .03   | .18*  | .27*  | .26*  | .38*  | .27*  | .47*  |       |       |       |       |      |       |       |       |       |       |       |       |       |       |       |     |
| 12. Science Grade <sup>c</sup>    | 4.26     | 0.97      | -.04* | .01   | .03  | .04*  | .16*  | .17*  | .21*  | .28*  | .25*  | .36*  | .48*  |       |       |       |      |       |       |       |       |       |       |       |       |       |       |     |
| 9th Grade                         |          |           |       |       |      |       |       |       |       |       |       |       |       |       |       |       |      |       |       |       |       |       |       |       |       |       |       |     |
| 13. Neuroticism                   | 2.85     | 0.86      | .37*  | -.12* | .06* | .04*  | .00   | -.06* | .01   | -.10* | -.08* | .03   | -.07* | -.05* |       |       |      |       |       |       |       |       |       |       |       |       |       |     |
| 14. Extraversion                  | 3.30     | 0.85      | -.19* | .48*  | .03* | -.01  | .02   | -.04* | -.01  | -.01  | -.02  | .07*  | -.01  | .01   | -.29* |       |      |       |       |       |       |       |       |       |       |       |       |     |
| 15. Openness                      | 3.37     | 0.95      | -.01  | .05*  | .52* | .11*  | .05*  | .06*  | .10*  | .05*  | .08*  | .10*  | -.00  | .03   | .03   | .05*  |      |       |       |       |       |       |       |       |       |       |       |     |
| 16. Agreeableness                 | 3.44     | 0.65      | .04*  | -.01  | .09* | .38*  | .19*  | -.00  | .01   | -.05* | -.05* | .03   | .01   | .02   | -.01  | -.01  | .13* |       |       |       |       |       |       |       |       |       |       |     |
| 17. Conscientious.                | 3.05     | 0.83      | -.03  | .00   | .05* | .17*  | .51*  | -.11* | -.03* | -.10* | -.11* | .16*  | .13*  | .20*  | -.01  | .07*  | .08* | .19*  |       |       |       |       |       |       |       |       |       |     |
| 18. gf                            | 9.20     | 2.25      | -.05* | -.02  | .10* | .03   | .01   | .50*  | .43*  | .51*  | .44*  | .17*  | .25*  | .18*  | -.03  | -.03  | .09* | .03   | -.05* |       |       |       |       |       |       |       |       |     |
| 19. German Comp.                  | -0.00    | 0.91      | -.02  | .04*  | .16* | .06*  | .10*  | .42*  | .80*  | .56*  | .59*  | .42*  | .25*  | .23*  | .03   | -.03  | .11* | .02   | .01   | .47*  |       |       |       |       |       |       |       |     |
| 20. Math Comp.                    | 0.01     | 1.19      | -.07* | -.01  | .06* | -.04  | .01   | .49*  | .60*  | .74*  | .65*  | .29*  | .41*  | .33*  | -.07* | -.04* | .03  | -.05* | -.05* | .53*  | .61*  |       |       |       |       |       |       |     |
| 21. Science Comp.                 | 0.04     | 0.93      | -.08* | -.00  | .13* | -.04* | -.02  | .45*  | .61*  | .65*  | .68*  | .28*  | .31*  | .30*  | -.07* | -.05* | .12* | -.05* | -.09* | .45*  | .61*  | .70*  |       |       |       |       |       |     |
| 22. German Grade                  | 4.24     | 0.84      | -.00  | .09*  | .14* | .08*  | .19*  | .15*  | .38*  | .22*  | .25*  | .54*  | .31*  | .35*  | .03   | .07*  | .14* | .06*  | .21*  | .15*  | .38*  | .25*  | .23*  |       |       |       |       |     |
| 23. Math Grade                    | 4.10     | 1.03      | -.04* | -.04* | -.01 | .04   | .13*  | .22*  | .21*  | .32*  | .23*  | .33*  | .56*  | .50*  | -.05* | -.04  | -.01 | .02   | .18*  | .24*  | .22*  | .38*  | .28*  | .40*  |       |       |       |     |
| 24. Science Grade                 | 4.21     | 1.00      | -.02  | .01   | .00  | .03   | .14*  | .19*  | .18*  | .24*  | .23*  | .31*  | .42*  | .62*  | -.07* | .00   | .02  | .03   | .18*  | .18*  | .22*  | .30*  | .27*  | .39*  | .54*  |       |       |     |
| Covariates                        |          |           |       |       |      |       |       |       |       |       |       |       |       |       |       |       |      |       |       |       |       |       |       |       |       |       |       |     |
| 25. Migrat. Status                | 0.15     | 0.36      | .00   | -.02  | .00  | -.00  | .02   | -.13* | -.14* | -.16* | -.26* | -.11* | -.09* | -.07* | .01   | .01   | -.01 | .01   | .02   | -.12* | -.12* | -.15* | -.19* | -.10* | -.04* | -.06* |       |     |
| 26. HISEI                         | -0.00    | 1.00      | -.06* | .08*  | .09* | .04*  | .04   | .22*  | .35*  | .36*  | .35*  | .18*  | .16*  | .17*  | -.03  | .05*  | .06* | .01   | -.02  | .24*  | .35*  | .37*  | .35*  | .20*  | .17*  | .14*  | -.19* |     |
| 27. Gender                        | 0.48     | 0.50      | .16*  | .04*  | .22* | .18*  | .18*  | -.04* | .16*  | -.14* | -.09* | .21*  | -.04* | -.01  | .26*  | -.02  | .21* | .13*  | .16*  | .02   | .19*  | -.12* | -.06* | .26*  | -.01  | -.01  | -.00  | .00 |

*Note.* cog. = cognitive; Comp. = Competence; HISEI = highest socioeconomic status.

<sup>a</sup> assessed in 5th grade; <sup>b</sup> assessed in 6th grade; <sup>c</sup> referring to 8th grade.

\*  $p < .01$ .

Table S2. *Standardized Regression Coefficients for the Cross-sectional Models Predicting German, Math, and Science Grades*

|                            | 7 <sup>th</sup> Grade |       |          |         |       |          |         |       |          | 9 <sup>th</sup> Grade |       |          |         |       |          |         |       |          |
|----------------------------|-----------------------|-------|----------|---------|-------|----------|---------|-------|----------|-----------------------|-------|----------|---------|-------|----------|---------|-------|----------|
|                            | Model 1               |       |          | Model 2 |       |          | Model 3 |       |          | Model 1               |       |          | Model 2 |       |          | Model 3 |       |          |
|                            | $\beta$               | SE    | <i>p</i> | $\beta$ | SE    | <i>p</i> | $\beta$ | SE    | <i>p</i> | $\beta$               | SE    | <i>p</i> | $\beta$ | SE    | <i>p</i> | $\beta$ | SE    | <i>p</i> |
| German                     |                       |       |          |         |       |          |         |       |          |                       |       |          |         |       |          |         |       |          |
| Neuroticism                | 0.007                 | 0.013 | .591     | 0.015   | 0.012 | .224     | -0.006  | 0.012 | .656     | 0.044                 | 0.015 | .002     | 0.040   | 0.014 | .003     | -0.001  | 0.014 | .926     |
| Extraversion               | 0.086                 | 0.014 | <.001    | 0.067   | 0.013 | <.001    | 0.058   | 0.012 | <.001    | 0.060                 | 0.015 | <.001    | 0.069   | 0.014 | <.001    | 0.059   | 0.014 | <.001    |
| Openness                   | 0.098                 | 0.013 | <.001    | 0.037   | 0.013 | .003     | 0.019   | 0.013 | .142     | 0.123                 | 0.014 | <.001    | 0.078   | 0.013 | <.001    | 0.049   | 0.013 | <.001    |
| Agreeableness              | 0.001                 | 0.015 | .954     | -0.003  | 0.013 | .799     | -0.018  | 0.013 | .171     | 0.008                 | 0.015 | .602     | 0.007   | 0.014 | .621     | -0.007  | 0.014 | .622     |
| Conscientiousness          | 0.189                 | 0.014 | <.001    | 0.157   | 0.013 | <.001    | 0.144   | 0.013 | <.001    | 0.190                 | 0.014 | <.001    | 0.191   | 0.013 | <.001    | 0.174   | 0.013 | <.001    |
| German Comp.               |                       |       |          | 0.438   | 0.014 | <.001    | 0.400   | 0.015 | <.001    |                       |       |          | 0.384   | 0.015 | <.001    | 0.322   | 0.017 | <.001    |
| General Cog. Comp.         |                       |       |          | -0.010  | 0.016 | .517     | -0.004  | 0.016 | .812     |                       |       |          | -0.018  | 0.016 | .278     | -0.017  | 0.016 | .310     |
| Migration Status           |                       |       |          |         |       |          | -0.054  | 0.013 | <.001    |                       |       |          |         |       |          | -0.051  | 0.014 | <.001    |
| HISEI                      |                       |       |          |         |       |          | 0.035   | 0.015 | .021     |                       |       |          |         |       |          | 0.079   | 0.016 | <.001    |
| Gender                     |                       |       |          |         |       |          | 0.119   | 0.012 | <.001    |                       |       |          |         |       |          | 0.167   | 0.013 | <.001    |
| $R^2$                      |                       | .058  |          |         | .240  |          |         | .256  |          |                       | .062  |          |         | .203  |          |         | .234  |          |
| $\Delta R^2_{Big\ Five^a}$ |                       |       |          |         | .024  |          |         |       |          |                       |       |          |         | .038  |          |         |       |          |
| Math                       |                       |       |          |         |       |          |         |       |          |                       |       |          |         |       |          |         |       |          |
| Neuroticism                | -0.057                | 0.014 | <.001    | -0.013  | 0.013 | .306     | -0.013  | 0.013 | .320     | -0.070                | 0.015 | <.001    | -0.032  | 0.014 | .023     | -0.038  | 0.015 | .010     |
| Extraversion               | -0.023                | 0.014 | .092     | -0.015  | 0.013 | .245     | -0.016  | 0.013 | .192     | -0.070                | 0.015 | <.001    | -0.045  | 0.014 | .002     | -0.048  | 0.014 | .001     |
| Openness                   | -0.007                | 0.013 | .596     | -0.052  | 0.012 | <.001    | -0.052  | 0.013 | <.001    | -0.017                | 0.014 | .249     | -0.044  | 0.013 | .001     | -0.049  | 0.014 | <.001    |
| Agreeableness              | -0.028                | 0.014 | .046     | -0.017  | 0.013 | .195     | -0.018  | 0.013 | .176     | -0.012                | 0.015 | .413     | 0.004   | 0.014 | .796     | 0.001   | 0.014 | .929     |
| Conscientiousness          | 0.186                 | 0.014 | <.001    | 0.198   | 0.013 | <.001    | 0.198   | 0.013 | <.001    | 0.184                 | 0.014 | <.001    | 0.207   | 0.013 | <.001    | 0.205   | 0.014 | <.001    |
| Math Comp.                 |                       |       |          | 0.333   | 0.015 | <.001    | 0.322   | 0.017 | <.001    |                       |       |          | 0.355   | 0.016 | <.001    | 0.351   | 0.017 | <.001    |
| General Cog. Comp.         |                       |       |          | 0.112   | 0.018 | <.001    | 0.110   | 0.018 | <.001    |                       |       |          | 0.063   | 0.017 | <.001    | 0.061   | 0.017 | <.001    |
| Migration Status           |                       |       |          |         |       |          | -0.021  | 0.014 | .124     |                       |       |          |         |       |          | 0.028   | 0.014 | .044     |
| HISEI                      |                       |       |          |         |       |          | 0.022   | 0.016 | .174     |                       |       |          |         |       |          | 0.031   | 0.017 | .064     |
| Gender                     |                       |       |          |         |       |          | -0.003  | 0.013 | .825     |                       |       |          |         |       |          | 0.021   | 0.014 | .132     |
| $R^2$                      |                       | .036  |          |         | .196  |          |         | .197  |          |                       | .039  |          |         | .191  |          |         | .192  |          |
| $\Delta R^2_{Big\ Five^a}$ |                       |       |          |         | .039  |          |         |       |          |                       |       |          |         | .044  |          |         |       |          |
| Science                    |                       |       |          |         |       |          |         |       |          |                       |       |          |         |       |          |         |       |          |
| Neuroticism                | -0.039                | 0.015 | .009     | -0.007  | 0.015 | .628     | -0.004  | 0.015 | .771     | -0.072                | 0.015 | <.001    | -0.041  | 0.015 | .005     | -0.039  | 0.015 | .012     |
| Extraversion               | 0.003                 | 0.015 | .836     | 0.011   | 0.014 | .450     | 0.005   | 0.014 | .722     | -0.029                | 0.015 | .052     | -0.008  | 0.014 | .595     | -0.010  | 0.014 | .499     |
| Openness                   | 0.013                 | 0.014 | .351     | -0.030  | 0.014 | .042     | -0.028  | 0.015 | .057     | 0.006                 | 0.015 | .698     | -0.041  | 0.014 | .005     | -0.039  | 0.015 | .009     |
| Agreeableness              | -0.010                | 0.015 | .510     | 0.007   | 0.015 | .636     | 0.005   | 0.015 | .765     | -0.009                | 0.015 | .571     | 0.004   | 0.015 | .812     | 0.004   | 0.015 | .797     |
| Conscientiousness          | 0.165                 | 0.015 | <.001    | 0.180   | 0.014 | <.001    | 0.178   | 0.014 | <.001    | 0.184                 | 0.015 | <.001    | 0.214   | 0.014 | <.001    | 0.215   | 0.014 | <.001    |
| Science Comp.              |                       |       |          | 0.227   | 0.018 | <.001    | 0.196   | 0.020 | <.001    |                       |       |          | 0.259   | 0.017 | <.001    | 0.245   | 0.018 | <.001    |
| General Cog. Comp.         |                       |       |          | 0.088   | 0.018 | <.001    | 0.081   | 0.018 | <.001    |                       |       |          | 0.078   | 0.017 | <.001    | 0.075   | 0.017 | <.001    |
| Migration Status           |                       |       |          |         |       |          | -0.004  | 0.016 | .818     |                       |       |          |         |       |          | -0.006  | 0.015 | .698     |
| HISEI                      |                       |       |          |         |       |          | 0.086   | 0.018 | <.001    |                       |       |          |         |       |          | 0.037   | 0.018 | .042     |
| Gender                     |                       |       |          |         |       |          | -0.016  | 0.014 | .280     |                       |       |          |         |       |          | -0.012  | 0.014 | .397     |
| $R^2$                      |                       | .029  |          |         | .104  |          |         | .111  |          |                       | .038  |          |         | .126  |          |         | .127  |          |
| $\Delta R^2_{Big\ Five^a}$ |                       |       |          |         | .032  |          |         |       |          |                       |       |          |         | .045  |          |         |       |          |

Note. <sup>a</sup> Incremental contributions of the Big Five beyond competencies and covariates (i.e.,  $\Delta R^2$  between Model M3 and a model with all predictors except the Big Five).

Table S3. *Standardized Coefficients from the Cross-sectional Mediation Analyses Predicting German, Mathematics, and Science Grades via Subject-specific Competencies*

|                                                                          | German  |       |       | Mathematics |       |       | Science |       |       |
|--------------------------------------------------------------------------|---------|-------|-------|-------------|-------|-------|---------|-------|-------|
|                                                                          | $\beta$ | SE    | $p$   | $\beta$     | SE    | $p$   | $\beta$ | SE    | $p$   |
| <b>7th Grade</b>                                                         |         |       |       |             |       |       |         |       |       |
| <i>Direct Relations: Personality <math>\rightarrow</math> Competence</i> |         |       |       |             |       |       |         |       |       |
| N                                                                        | -0.015  | 0.013 | .244  | -0.104      | 0.013 | <.001 | -0.121  | 0.017 | <.001 |
| E                                                                        | 0.047   | 0.013 | <.001 | -0.008      | 0.013 | .522  | -0.016  | 0.017 | .337  |
| O                                                                        | 0.146   | 0.013 | <.001 | 0.102       | 0.013 | <.001 | 0.143   | 0.016 | <.001 |
| A                                                                        | 0.005   | 0.014 | .728  | -0.029      | 0.014 | .037  | -0.060  | 0.018 | .001  |
| C                                                                        | 0.075   | 0.014 | <.001 | -0.019      | 0.014 | .192  | -0.056  | 0.017 | .001  |
| <i>Direct Relation: Competence <math>\rightarrow</math> Grade</i>        |         |       |       |             |       |       |         |       |       |
| Comp                                                                     | 0.398   | 0.013 | <.001 | 0.343       | 0.014 | <.001 | 0.197   | 0.019 | <.001 |
| <i>Direct Relations: Personality <math>\rightarrow</math> Grade</i>      |         |       |       |             |       |       |         |       |       |
| N                                                                        | -0.005  | 0.012 | .689  | -0.010      | 0.013 | .425  | 0.000   | 0.015 | .991  |
| E                                                                        | 0.059   | 0.013 | <.001 | -0.016      | 0.012 | .204  | 0.004   | 0.014 | .792  |
| O                                                                        | 0.016   | 0.013 | .215  | -0.057      | 0.013 | <.001 | -0.030  | 0.015 | .040  |
| A                                                                        | -0.018  | 0.014 | .182  | -0.017      | 0.014 | .203  | 0.006   | 0.016 | .707  |
| C                                                                        | 0.146   | 0.012 | <.001 | 0.200       | 0.013 | <.001 | 0.181   | 0.015 | <.001 |
| <i>Indirect Relations: Personality <math>\rightarrow</math> Grade</i>    |         |       |       |             |       |       |         |       |       |
| N                                                                        | -0.006  | 0.005 | .244  | -0.036      | 0.005 | <.001 | -0.024  | 0.004 | <.001 |
| E                                                                        | 0.019   | 0.005 | <.001 | -0.003      | 0.004 | .522  | -0.003  | 0.003 | .338  |
| O                                                                        | 0.058   | 0.006 | <.001 | 0.035       | 0.005 | <.001 | 0.028   | 0.004 | <.001 |
| A                                                                        | 0.002   | 0.006 | .728  | -0.010      | 0.005 | .037  | -0.012  | 0.004 | .001  |
| C                                                                        | 0.030   | 0.006 | <.001 | -0.006      | 0.005 | .193  | -0.011  | 0.004 | .002  |
| <b>9th Grade</b>                                                         |         |       |       |             |       |       |         |       |       |
| <i>Direct Relations: Personality <math>\rightarrow</math> Competence</i> |         |       |       |             |       |       |         |       |       |
| N                                                                        | 0.016   | 0.015 | .306  | -0.096      | 0.015 | <.001 | -0.100  | 0.015 | <.001 |
| E                                                                        | -0.030  | 0.016 | .052  | -0.068      | 0.015 | <.001 | -0.074  | 0.015 | <.001 |
| O                                                                        | 0.125   | 0.015 | <.001 | 0.054       | 0.014 | <.001 | 0.145   | 0.014 | <.001 |
| A                                                                        | 0.010   | 0.016 | .536  | -0.043      | 0.015 | .005  | -0.045  | 0.015 | .002  |
| C                                                                        | 0.001   | 0.015 | .964  | -0.047      | 0.014 | .001  | -0.095  | 0.014 | <.001 |
| <i>Direct Relation: Competence <math>\rightarrow</math> Grade</i>        |         |       |       |             |       |       |         |       |       |
| Comp                                                                     | 0.329   | 0.016 | <.001 | 0.346       | 0.016 | <.001 | 0.244   | 0.017 | <.001 |
| <i>Direct Relations: Personality <math>\rightarrow</math> Grade</i>      |         |       |       |             |       |       |         |       |       |
| N                                                                        | -0.002  | 0.014 | .877  | -0.037      | 0.015 | .015  | -0.038  | 0.016 | .017  |
| E                                                                        | 0.060   | 0.014 | <.001 | -0.048      | 0.014 | .001  | -0.010  | 0.015 | .509  |
| O                                                                        | 0.047   | 0.014 | .001  | -0.050      | 0.013 | <.001 | -0.040  | 0.015 | .008  |
| A                                                                        | -0.007  | 0.014 | .623  | 0.002       | 0.014 | .870  | 0.005   | 0.015 | .748  |
| C                                                                        | 0.176   | 0.013 | <.001 | 0.208       | 0.014 | <.001 | 0.218   | 0.015 | <.001 |
| <i>Indirect Relations: Personality <math>\rightarrow</math> Grade</i>    |         |       |       |             |       |       |         |       |       |
| N                                                                        | 0.005   | 0.005 | .306  | -0.033      | 0.006 | <.001 | -0.024  | 0.004 | <.001 |
| E                                                                        | -0.010  | 0.005 | .052  | -0.024      | 0.005 | <.001 | -0.018  | 0.004 | <.001 |
| O                                                                        | 0.041   | 0.005 | <.001 | 0.019       | 0.005 | <.001 | 0.035   | 0.004 | <.001 |
| A                                                                        | 0.003   | 0.005 | .537  | -0.015      | 0.005 | .006  | -0.011  | 0.004 | .003  |
| C                                                                        | 0.000   | 0.005 | .964  | -0.016      | 0.005 | .001  | -0.023  | 0.004 | <.001 |

*Note.* N = neuroticism; E = extraversion; O = openness; A = agreeableness; C = conscientiousness; Comp = subject-specific competence.

The mediation analyses build on the cross-sectional models M3. Displayed are only the parameters related to the mediation effect of personality. The cross-sectional nature of the data does not warrant causal interpretation.

Table S4

*Standardized Estimates for the Longitudinal Models Predicting Change in Grades with Change in Personality and Competencies*

|                          | Change in German Grades  |       |          |                          |       |          | Change in Math Grades    |       |          |                          |       |          | Change in Science Grades |       |          |                          |       |          |
|--------------------------|--------------------------|-------|----------|--------------------------|-------|----------|--------------------------|-------|----------|--------------------------|-------|----------|--------------------------|-------|----------|--------------------------|-------|----------|
|                          | Model 1 <sub>longi</sub> |       |          | Model 2 <sub>longi</sub> |       |          | Model 1 <sub>longi</sub> |       |          | Model 2 <sub>longi</sub> |       |          | Model 1 <sub>longi</sub> |       |          | Model 2 <sub>longi</sub> |       |          |
|                          | $\beta$                  | SE    | <i>p</i> |
| Change in Neuroticism    | 0.008                    | 0.014 | .549     | 0.009                    | 0.014 | .500     | -0.003                   | 0.014 | .829     | 0.000                    | 0.014 | .977     | -0.038                   | 0.014 | .008     | -0.036                   | 0.014 | .013     |
| Change in Extraversion   | -0.009                   | 0.014 | .527     | -0.001                   | 0.014 | .946     | -0.014                   | 0.014 | .312     | -0.010                   | 0.013 | .444     | -0.025                   | 0.015 | .087     | -0.023                   | 0.014 | .109     |
| Change in Openness       | 0.018                    | 0.013 | .183     | 0.027                    | 0.013 | .041     | -0.011                   | 0.014 | .444     | -0.004                   | 0.014 | .762     | 0.011                    | 0.014 | .433     | 0.015                    | 0.014 | .282     |
| Change in Agreeableness  | 0.002                    | 0.014 | .876     | 0.002                    | 0.014 | .906     | -0.006                   | 0.014 | .655     | -0.010                   | 0.014 | .484     | 0.018                    | 0.015 | .239     | 0.014                    | 0.015 | .345     |
| Change in Conscientious. | 0.033                    | 0.014 | .020     | 0.053                    | 0.014 | <.001    | 0.079                    | 0.014 | <.001    | 0.093                    | 0.014 | <.001    | 0.021                    | 0.015 | .151     | 0.032                    | 0.015 | .028     |
| Change in Competencies   |                          |       |          | 0.034                    | 0.014 | .017     |                          |       |          | 0.069                    | 0.014 | <.001    |                          |       |          | -0.003                   | 0.018 | .887     |
| Change in General Comp.  |                          |       |          | 0.021                    | 0.016 | .176     |                          |       |          | 0.022                    | 0.016 | .173     |                          |       |          | -0.002                   | 0.017 | .914     |

Table S5

*Standardized Regression Coefficients for the Cross-sectional Models Predicting German, Math, and Science Grades; Separated for Students at Non-Academic and Academic Track Schools*

|                             | German             |       |          |                |       |          | Math               |       |          |                |       |          | Science            |       |          |                |       |          |
|-----------------------------|--------------------|-------|----------|----------------|-------|----------|--------------------|-------|----------|----------------|-------|----------|--------------------|-------|----------|----------------|-------|----------|
|                             | Non-Academic Track |       |          | Academic Track |       |          | Non-Academic Track |       |          | Academic Track |       |          | Non-Academic Track |       |          | Academic Track |       |          |
|                             | $\beta$            | SE    | <i>p</i> | $\beta$        | SE    | <i>p</i> | $\beta$            | SE    | <i>p</i> | $\beta$        | SE    | <i>p</i> | $\beta$            | SE    | <i>p</i> | $\beta$        | SE    | <i>p</i> |
| <b>7<sup>th</sup> Grade</b> |                    |       |          |                |       |          |                    |       |          |                |       |          |                    |       |          |                |       |          |
| Neuroticism                 | -0.022             | 0.021 | .301     | 0.025          | 0.019 | .192     | -0.049             | 0.021 | .021     | 0.015          | 0.020 | .446     | -0.041             | 0.023 | .073     | 0.022          | 0.023 | .347     |
| Extraversion                | 0.054              | 0.021 | .011     | 0.081          | 0.020 | <.001    | -0.026             | 0.021 | .202     | -0.010         | 0.020 | .598     | 0.027              | 0.022 | .220     | -0.005         | 0.023 | .841     |
| Openness                    | 0.018              | 0.021 | .401     | 0.002          | 0.020 | .927     | -0.029             | 0.020 | .153     | -0.099         | 0.020 | <.001    | -0.009             | 0.023 | .707     | -0.046         | 0.023 | .042     |
| Agreeableness               | -0.010             | 0.023 | .685     | -0.030         | 0.020 | .126     | -0.014             | 0.021 | .517     | -0.020         | 0.020 | .321     | 0.042              | 0.024 | .081     | -0.016         | 0.023 | .472     |
| Conscientiousness           | 0.143              | 0.021 | <.001    | 0.134          | 0.019 | <.001    | 0.175              | 0.021 | <.001    | 0.216          | 0.020 | <.001    | 0.171              | 0.023 | <.001    | 0.164          | 0.022 | <.001    |
| Competence                  | 0.325              | 0.022 | <.001    | 0.380          | 0.020 | <.001    | 0.304              | 0.024 | <.001    | 0.313          | 0.021 | <.001    | 0.191              | 0.032 | <.001    | 0.186          | 0.027 | <.001    |
| General Cog. Comp           | -0.013             | 0.026 | .624     | 0.027          | 0.022 | .222     | 0.096              | 0.030 | .001     | 0.151          | 0.024 | <.001    | 0.051              | 0.030 | .086     | 0.072          | 0.025 | .003     |
| Migration Status            | -0.031             | 0.021 | .129     | -0.076         | 0.019 | <.001    | 0.012              | 0.021 | .580     | -0.030         | 0.020 | .140     | 0.021              | 0.023 | .364     | -0.039         | 0.023 | .089     |
| HISEI                       | 0.004              | 0.025 | .883     | 0.067          | 0.021 | .002     | 0.024              | 0.025 | .353     | 0.070          | 0.022 | .002     | 0.069              | 0.028 | .015     | 0.074          | 0.024 | .002     |
| Gender                      | 0.118              | 0.020 | .000     | 0.112          | 0.020 | <.001    | -0.021             | 0.020 | .308     | 0.014          | 0.021 | .496     | -0.045             | 0.023 | .044     | -0.001         | 0.022 | .974     |
| <b>9<sup>th</sup> Grade</b> |                    |       |          |                |       |          |                    |       |          |                |       |          |                    |       |          |                |       |          |
| Neuroticism                 | -0.040             | 0.021 | .065     | 0.045          | 0.022 | .038     | -0.059             | 0.023 | .010     | -0.015         | 0.022 | .491     | -0.049             | 0.024 | .037     | -0.022         | 0.023 | .329     |
| Extraversion                | 0.057              | 0.021 | .007     | 0.075          | 0.021 | <.001    | -0.051             | 0.021 | .016     | -0.026         | 0.021 | .218     | 0.010              | 0.023 | .658     | -0.014         | 0.021 | .492     |
| Openness                    | 0.034              | 0.020 | .093     | 0.052          | 0.021 | .013     | -0.025             | 0.021 | .248     | -0.085         | 0.020 | <.001    | -0.020             | 0.024 | .389     | -0.057         | 0.022 | .008     |
| Agreeableness               | 0.021              | 0.021 | .317     | -0.035         | 0.021 | .104     | -0.006             | 0.022 | .790     | 0.000          | 0.020 | .996     | 0.018              | 0.024 | .453     | -0.029         | 0.022 | .177     |
| Conscientiousness           | 0.178              | 0.020 | <.001    | 0.160          | 0.021 | <.001    | 0.168              | 0.021 | <.001    | 0.213          | 0.020 | <.001    | 0.189              | 0.022 | <.001    | 0.224          | 0.021 | <.001    |
| Competence                  | 0.263              | 0.023 | <.001    | 0.313          | 0.022 | <.001    | 0.283              | 0.023 | <.001    | 0.398          | 0.020 | <.001    | 0.190              | 0.024 | <.001    | 0.270          | 0.022 | <.001    |
| General Cog. Comp.          | -0.010             | 0.023 | .667     | 0.003          | 0.021 | .902     | 0.071              | 0.024 | .004     | 0.078          | 0.021 | <.001    | 0.066              | 0.024 | .007     | 0.100          | 0.022 | <.001    |
| Migration Status            | -0.014             | 0.020 | .498     | -0.099         | 0.020 | <.001    | 0.023              | 0.022 | .287     | 0.027          | 0.019 | .162     | 0.007              | 0.023 | .773     | -0.020         | 0.021 | .338     |
| HISEI                       | 0.085              | 0.025 | .001     | 0.098          | 0.022 | <.001    | 0.045              | 0.027 | .095     | 0.066          | 0.022 | .003     | 0.069              | 0.030 | .020     | 0.043          | 0.023 | .061     |
| Gender                      | 0.179              | 0.020 | <.001    | 0.165          | 0.021 | <.001    | 0.038              | 0.021 | .074     | 0.045          | 0.021 | .033     | 0.011              | 0.023 | .639     | -0.031         | 0.022 | .164     |

Table S6

*Class-centered, Standardized Regression Coefficients for the Cross-sectional Models Predicting German, Math, and Science Grades*

|                       | 7 <sup>th</sup> Grade |       |          |                  |       |          |                  |       |          | 9 <sup>th</sup> Grade |       |          |                  |       |          |                  |       |          |
|-----------------------|-----------------------|-------|----------|------------------|-------|----------|------------------|-------|----------|-----------------------|-------|----------|------------------|-------|----------|------------------|-------|----------|
|                       | Model 1 centered      |       |          | Model 2 centered |       |          | Model 3 centered |       |          | Model 1 centered      |       |          | Model 2 centered |       |          | Model 3 centered |       |          |
|                       | $\beta$               | SE    | <i>p</i> | $\beta$          | SE    | <i>p</i> | $\beta$          | SE    | <i>p</i> | $\beta$               | SE    | <i>p</i> | $\beta$          | SE    | <i>p</i> | $\beta$          | SE    | <i>p</i> |
| <b>German</b>         |                       |       |          |                  |       |          |                  |       |          |                       |       |          |                  |       |          |                  |       |          |
| Neuroticism           | 0.014                 | 0.014 | .339     | 0.015            | 0.014 | .287     | -0.008           | 0.014 | .575     | 0.044                 | 0.017 | .009     | 0.039            | 0.016 | .016     | -0.003           | 0.017 | .883     |
| Extraversion          | 0.062                 | 0.015 | <.001    | 0.047            | 0.014 | .001     | 0.042            | 0.014 | .003     | 0.040                 | 0.017 | .017     | 0.049            | 0.016 | .003     | 0.042            | 0.016 | .009     |
| Openness              | 0.059                 | 0.014 | <.001    | 0.024            | 0.014 | .094     | 0.006            | 0.014 | .681     | 0.081                 | 0.016 | <.001    | 0.057            | 0.016 | <.001    | 0.030            | 0.016 | .061     |
| Agreeableness         | 0.002                 | 0.015 | .906     | -0.001           | 0.015 | .953     | -0.013           | 0.015 | .365     | 0.000                 | 0.018 | .998     | 0.002            | 0.017 | .893     | -0.011           | 0.017 | .495     |
| Conscientiousness     | 0.199                 | 0.015 | <.001    | 0.172            | 0.014 | <.001    | 0.159            | 0.014 | <.001    | 0.227                 | 0.016 | <.001    | 0.222            | 0.016 | <.001    | 0.203            | 0.016 | <.001    |
| German Comp.          |                       |       |          | 0.311            | 0.015 | <.001    | 0.296            | 0.016 | <.001    |                       |       |          | 0.299            | 0.018 | <.001    | 0.259            | 0.020 | <.001    |
| General Cog. Comp     |                       |       |          | -0.072           | 0.018 | <.001    | -0.058           | 0.019 | .002     |                       |       |          | -0.077           | 0.019 | <.001    | -0.069           | 0.019 | <.001    |
| Migration Status      |                       |       |          |                  |       |          | -0.043           | 0.015 | .004     |                       |       |          |                  |       |          | -0.046           | 0.017 | .008     |
| HISEI                 |                       |       |          |                  |       |          | -0.036           | 0.017 | .041     |                       |       |          |                  |       |          | 0.011            | 0.020 | .570     |
| Gender                |                       |       |          |                  |       |          | 0.119            | 0.014 | <.001    |                       |       |          |                  |       |          | 0.164            | 0.017 | <.001    |
| <i>R</i> <sup>2</sup> |                       | .050  |          |                  | .129  |          |                  | .144  |          |                       | .065  |          |                  | .139  |          |                  | .164  |          |
| <b>Math</b>           |                       |       |          |                  |       |          |                  |       |          |                       |       |          |                  |       |          |                  |       |          |
| Neuroticism           | -0.049                | 0.015 | .001     | -0.018           | 0.014 | .214     | -0.011           | 0.015 | .432     | -0.064                | 0.018 | <.001    | -0.033           | 0.017 | .050     | -0.034           | 0.017 | .052     |
| Extraversion          | -0.047                | 0.015 | .001     | -0.043           | 0.014 | .002     | -0.039           | 0.014 | .006     | -0.083                | 0.017 | <.001    | -0.058           | 0.017 | <.001    | -0.056           | 0.017 | .001     |
| Openness              | -0.034                | 0.014 | .017     | -0.067           | 0.014 | <.001    | -0.059           | 0.014 | <.001    | -0.035                | 0.017 | .037     | -0.051           | 0.016 | .001     | -0.051           | 0.016 | .002     |
| Agreeableness         | -0.025                | 0.015 | .101     | -0.014           | 0.014 | .340     | -0.009           | 0.015 | .546     | -0.028                | 0.018 | .106     | -0.012           | 0.017 | .452     | -0.012           | 0.017 | .456     |
| Conscientiousness     | 0.181                 | 0.015 | <.001    | 0.188            | 0.014 | <.001    | 0.194            | 0.014 | <.001    | 0.192                 | 0.017 | <.001    | 0.208            | 0.016 | <.001    | 0.207            | 0.016 | <.001    |
| Math Comp.            |                       |       |          | 0.247            | 0.017 | <.001    | 0.246            | 0.019 | <.001    |                       |       |          | 0.285            | 0.018 | <.001    | 0.303            | 0.020 | <.001    |
| General Cog. Comp     |                       |       |          | 0.092            | 0.020 | <.001    | 0.094            | 0.020 | <.001    |                       |       |          | 0.038            | 0.020 | .056     | 0.041            | 0.020 | .038     |
| Migration Status      |                       |       |          |                  |       |          | -0.008           | 0.016 | .608     |                       |       |          |                  |       |          | 0.026            | 0.018 | .141     |
| HISEI                 |                       |       |          |                  |       |          | -0.022           | 0.018 | .215     |                       |       |          |                  |       |          | -0.039           | 0.021 | .064     |
| Gender                |                       |       |          |                  |       |          | -0.039           | 0.014 | .005     |                       |       |          |                  |       |          | 0.006            | 0.017 | .725     |
| <i>R</i> <sup>2</sup> |                       | .035  |          |                  | .126  |          |                  | .128  |          |                       | .042  |          |                  | .134  |          |                  | .136  |          |
| <b>Science</b>        |                       |       |          |                  |       |          |                  |       |          |                       |       |          |                  |       |          |                  |       |          |
| Neuroticism           | -0.039                | 0.017 | .018     | -0.018           | 0.017 | .291     | -0.010           | 0.017 | .552     | -0.077                | 0.017 | <.001    | -0.052           | 0.017 | .003     | -0.036           | 0.018 | .038     |
| Extraversion          | -0.014                | 0.017 | .403     | -0.008           | 0.017 | .644     | -0.007           | 0.017 | .686     | -0.032                | 0.017 | .065     | -0.013           | 0.017 | .455     | -0.010           | 0.017 | .552     |
| Openness              | -0.002                | 0.016 | .911     | -0.029           | 0.016 | .074     | -0.019           | 0.017 | .265     | -0.025                | 0.018 | .158     | -0.060           | 0.017 | .001     | -0.049           | 0.018 | .005     |
| Agreeableness         | -0.010                | 0.017 | .576     | 0.005            | 0.017 | .782     | 0.009            | 0.017 | .623     | -0.039                | 0.018 | .031     | -0.025           | 0.018 | .156     | -0.021           | 0.018 | .251     |
| Conscientiousness     | 0.159                 | 0.016 | <.001    | 0.168            | 0.016 | <.001    | 0.174            | 0.016 | <.001    | 0.195                 | 0.017 | <.001    | 0.218            | 0.016 | <.001    | 0.225            | 0.017 | <.001    |
| Science Comp.         |                       |       |          | 0.177            | 0.022 | <.001    | 0.158            | 0.024 | <.001    |                       |       |          | 0.213            | 0.019 | <.001    | 0.209            | 0.020 | <.001    |
| General Cog. Comp     |                       |       |          | 0.020            | 0.022 | .370     | 0.018            | 0.022 | .416     |                       |       |          | 0.049            | 0.020 | .013     | 0.052            | 0.020 | .009     |
| Migration Status      |                       |       |          |                  |       |          | -0.037           | 0.018 | .039     |                       |       |          |                  |       |          | -0.011           | 0.019 | .550     |
| HISEI                 |                       |       |          |                  |       |          | 0.015            | 0.020 | .465     |                       |       |          |                  |       |          | -0.006           | 0.021 | .765     |
| Gender                |                       |       |          |                  |       |          | -0.050           | 0.016 | .002     |                       |       |          |                  |       |          | -0.057           | 0.017 | .001     |
| <i>R</i> <sup>2</sup> |                       | .027  |          |                  | .060  |          |                  | .064  |          |                       | .042  |          |                  | .096  |          |                  | .099  |          |

**Figure S1**

Standardized Estimates for the Cross-Sectional Models, Separated for Students at Non-Academic and Academic Track Schools

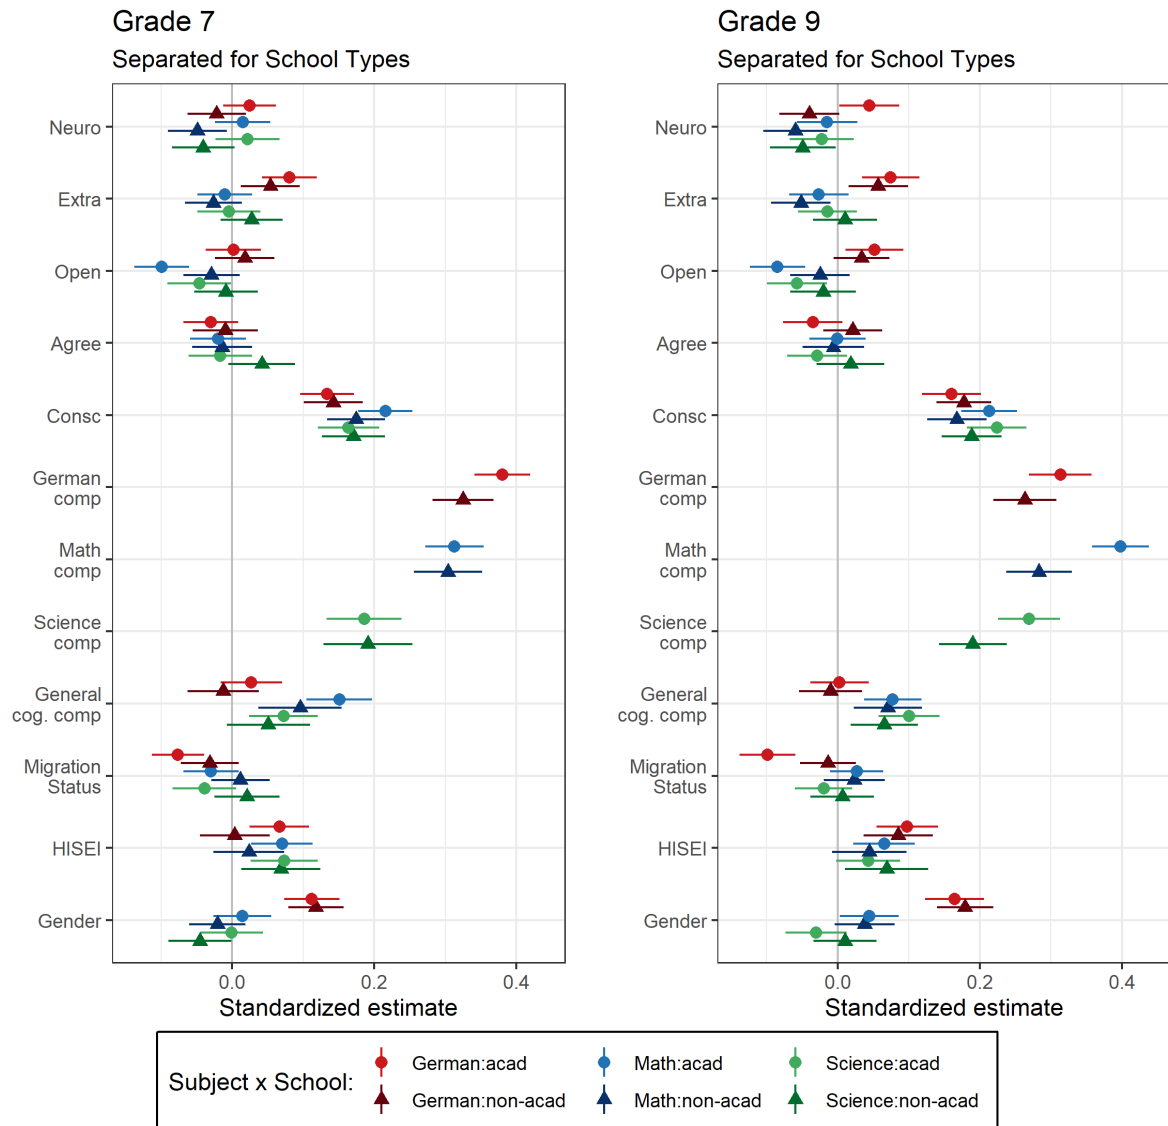

*Note.* Results are shown for the most comprehensive model M3, separately for the subjects and school types.

Neuro = neuroticism; Extra = extraversion; Open = openness; Agree = agreeableness; Consc = conscientiousness; comp = competence; cog = cognitive; HISEI = Highest International Socio-Economic Index of Occupational Status.

**Figure S2**

Standardized Estimates for the Cross-Sectional Models, Grades Centered Within Class

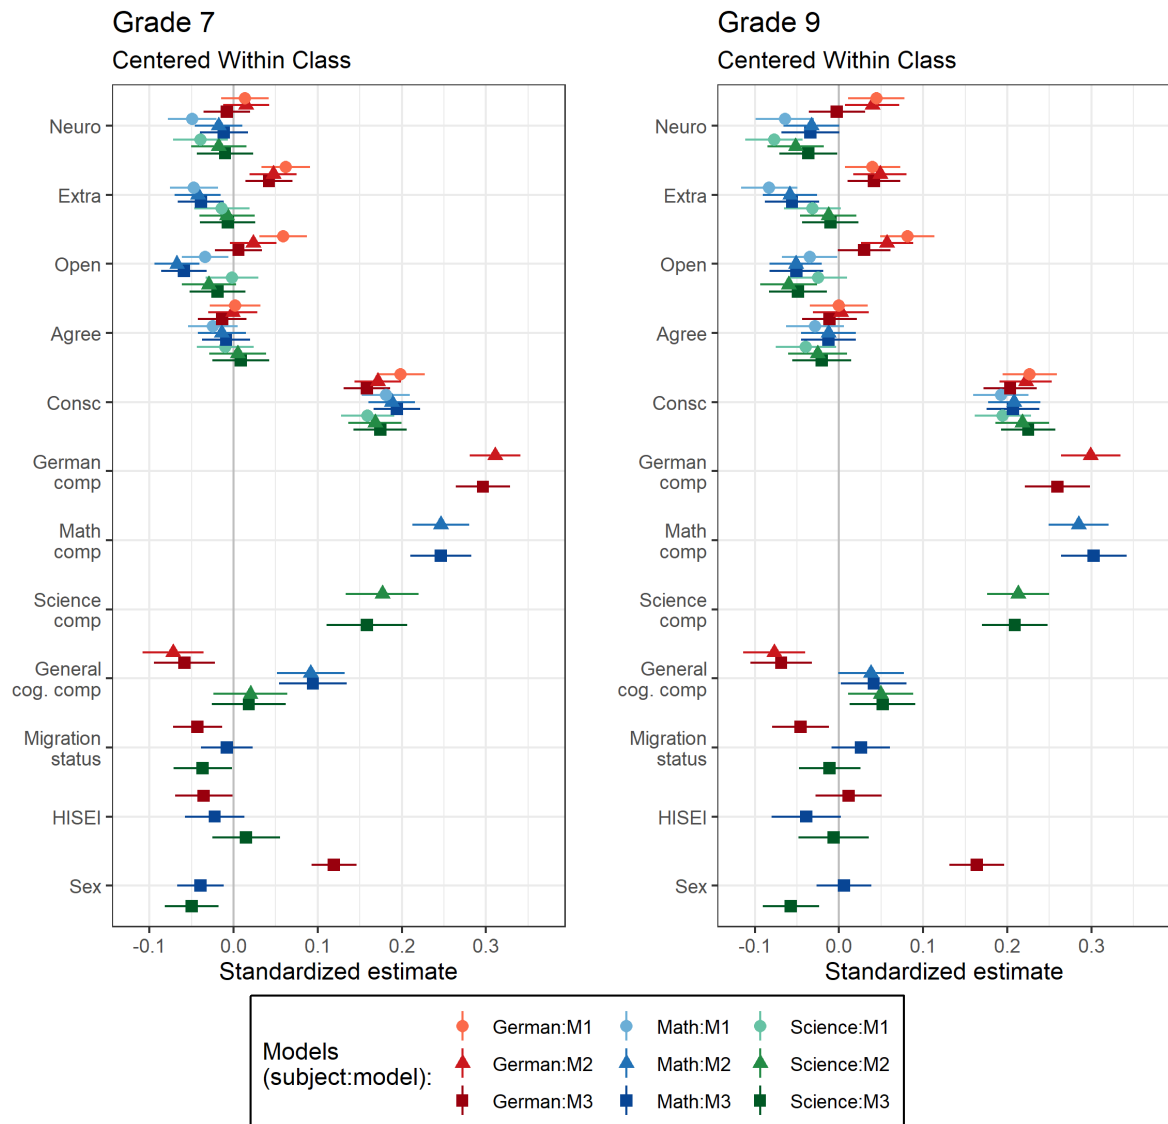

*Note.* Results are shown for the increasingly comprehensive models M1–M3, separately for the subjects and grade levels.

Neuro = neuroticism; Extra = extraversion; Open = openness; Agree = agreeableness; Consc = conscientiousness; comp = competence; cog = cognitive, HISEI = Highest International Socio-Economic Index of Occupational Status.
